# Supplementary material
Source: PubMed Central journal article supplement (PMC4451140)
Supplement: NIHMS693232-supplement-01.pdf [file NIHMS693232-supplement-01.pdf]

Supplementary Fig. 1

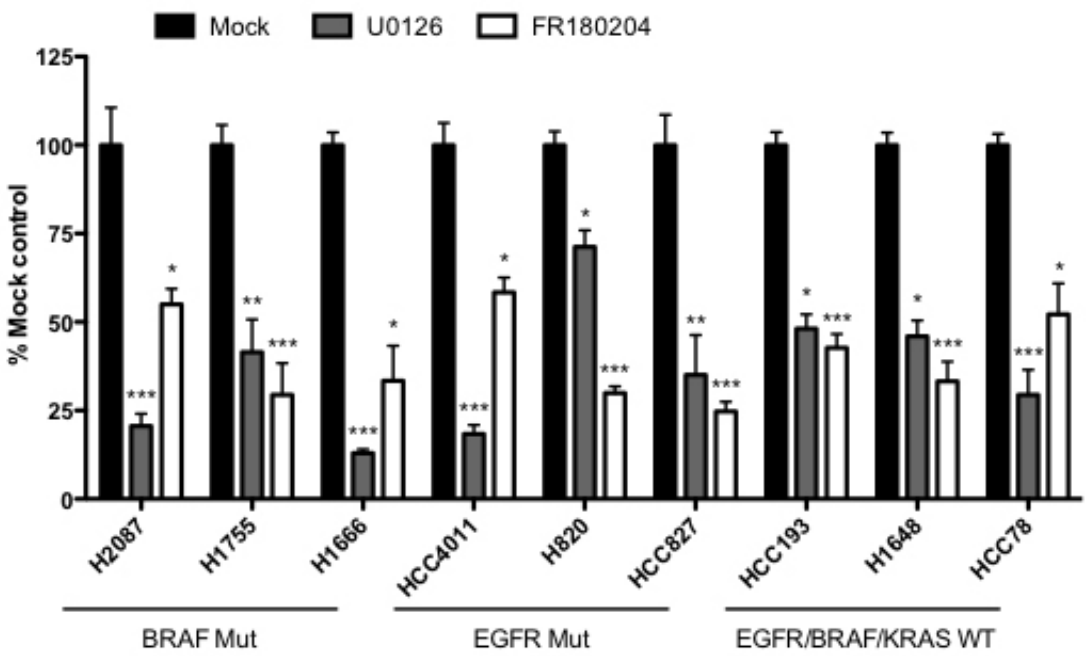

Supplementary Fig. 2

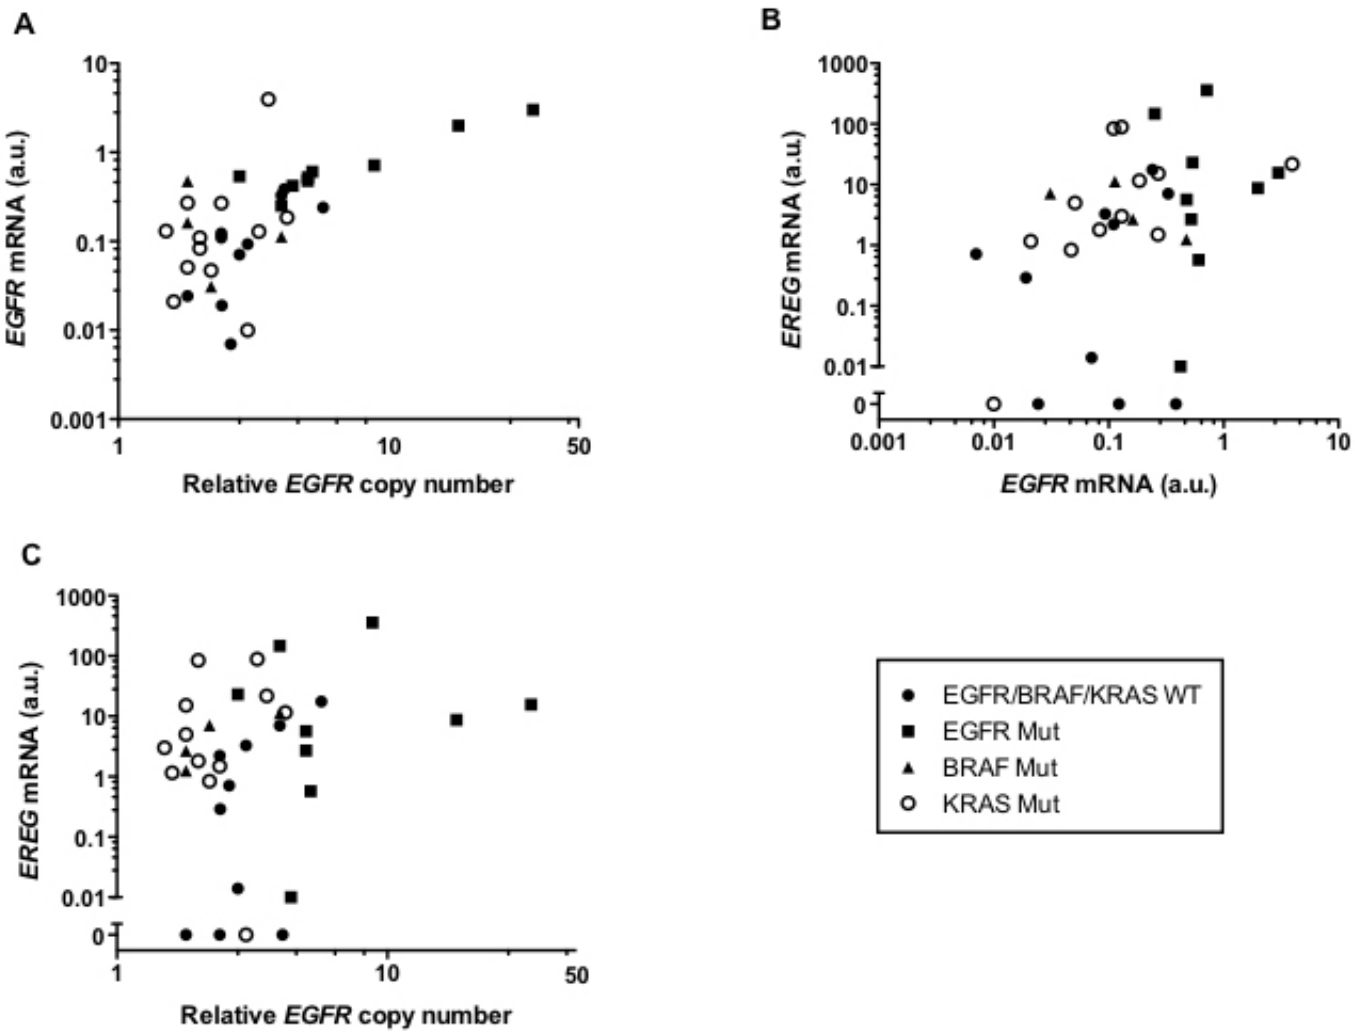

Supplementary Fig 3

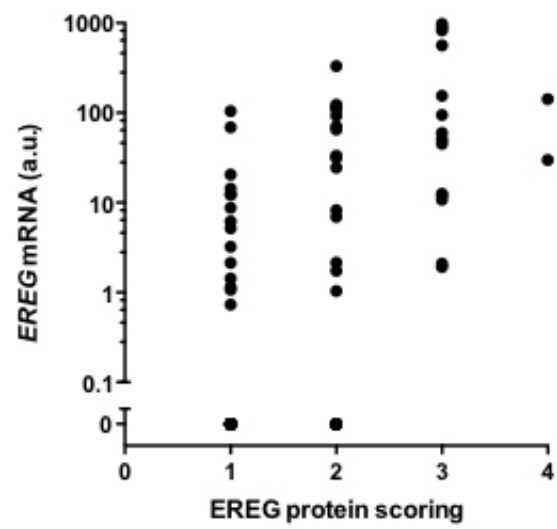

Supplementary Fig 4

A

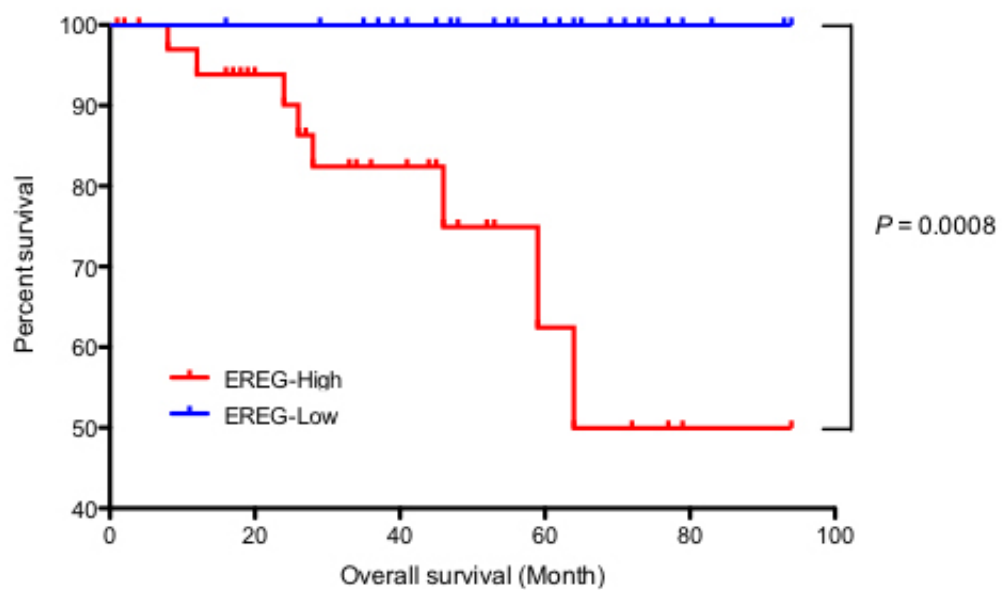

Supplementary Fig 4

**B**

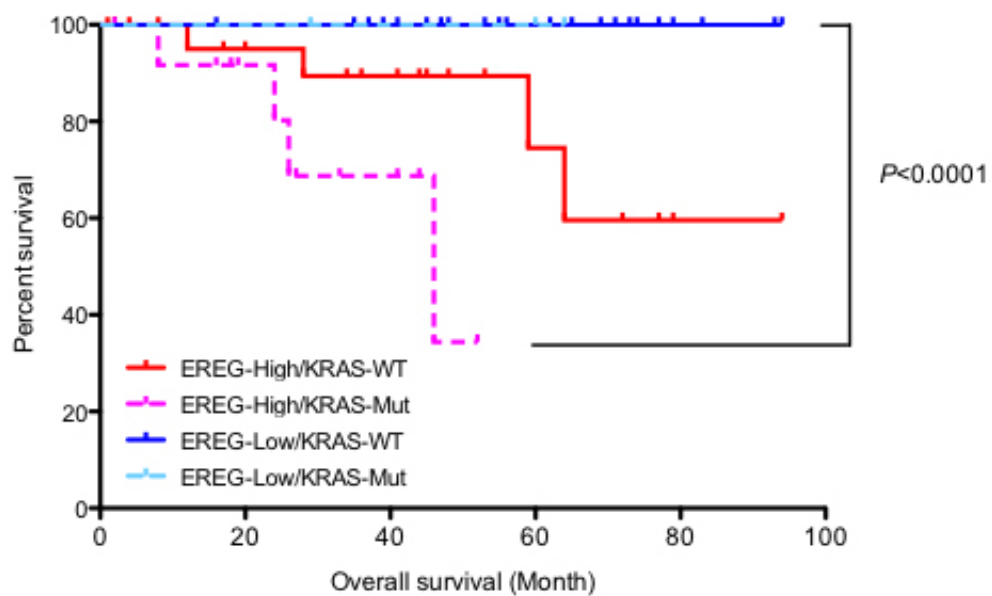

Supplementary Fig 5

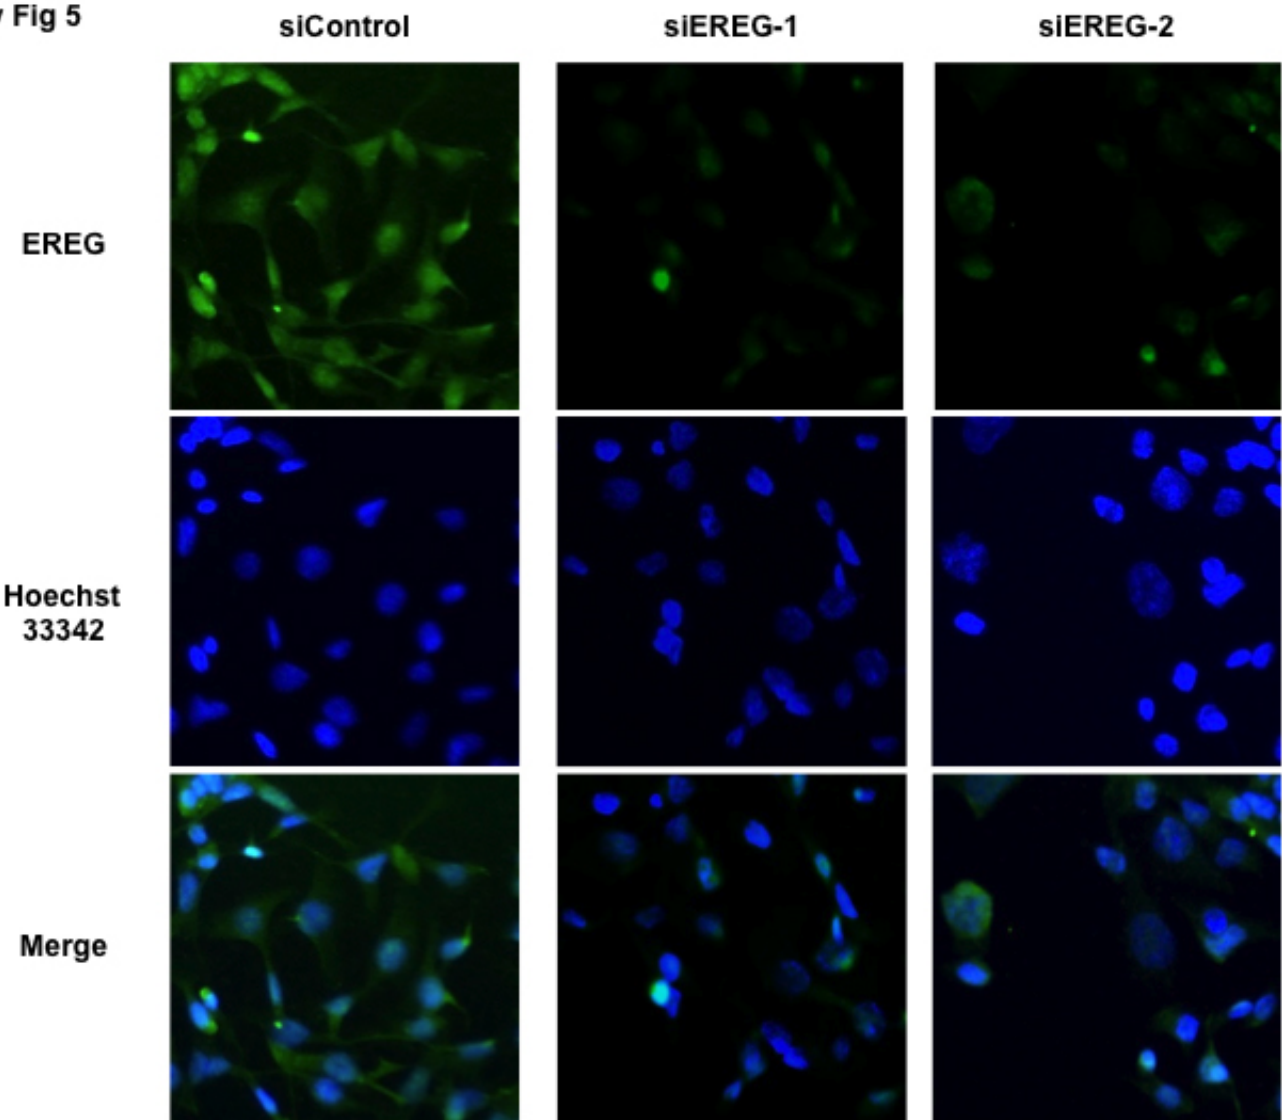

Supplementary Fig 6

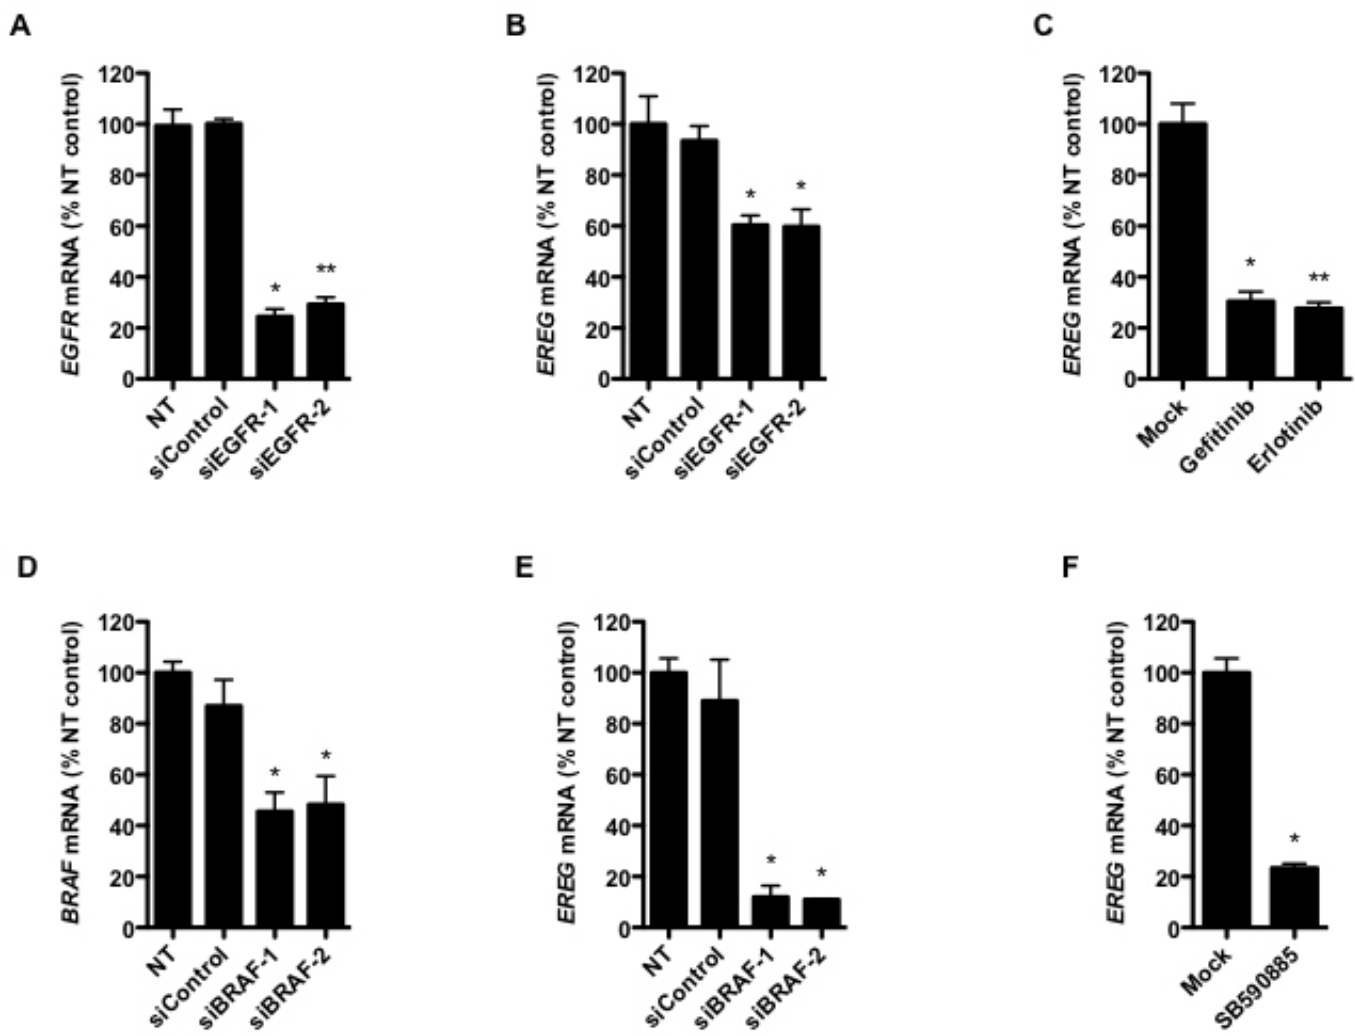

Supplementary Fig 7

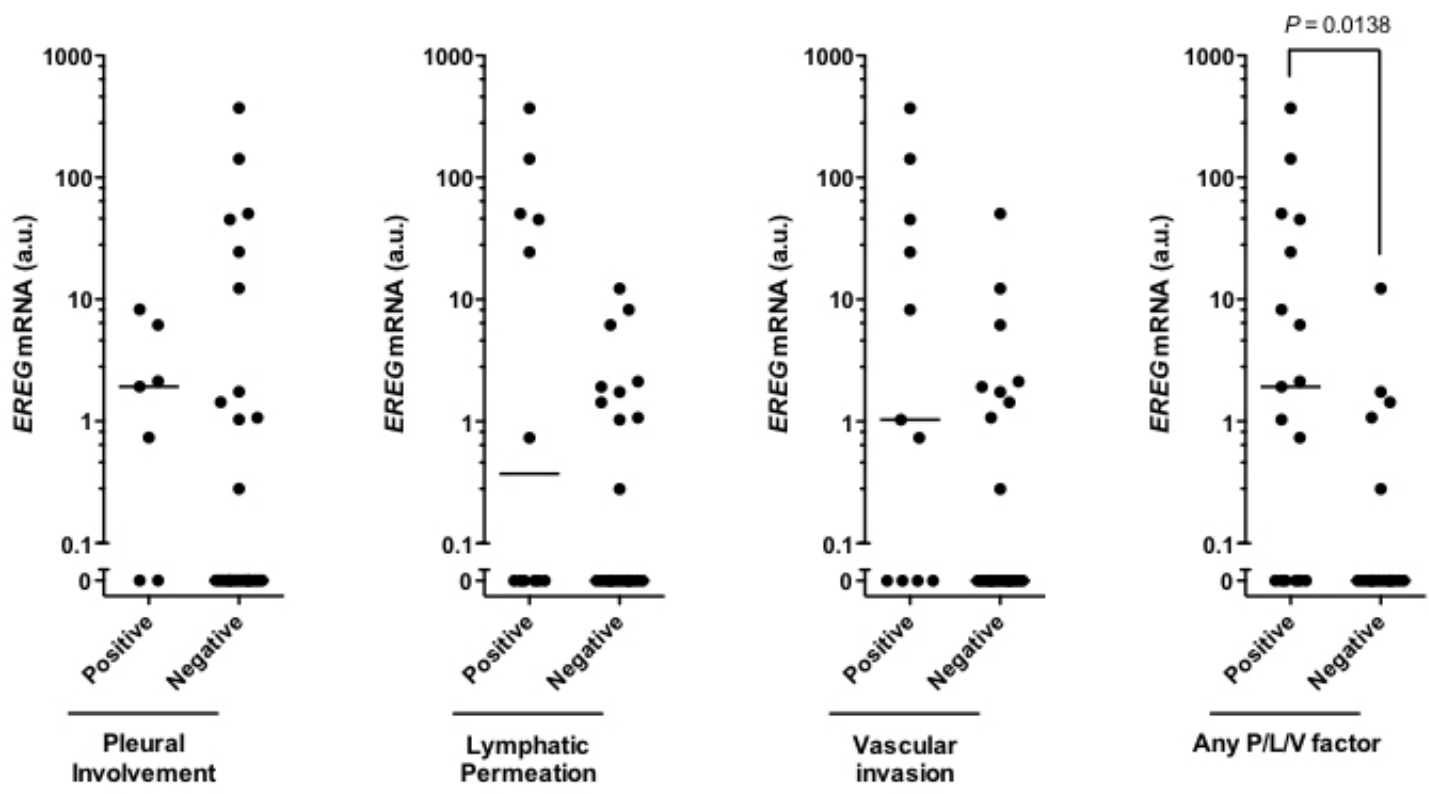



### Supplementary figure legends

**Supplementary Fig. 1.** The effects of U0126 and FR180204 on *EREG* expression in *EREG*-overexpressing NSCLC cells with wild-type *KRAS* (*BRAF* mutants, *EGFR* mutants, and NSCLCs with wild-type *EGFR/BRAF/KRAS*) as evaluated by the same methods in Fig. 2. \* $P < 0.05$ ; \*\* $P < 0.01$ ; \*\*\* $P < 0.001$  for comparison with mock treatment (DMSO alone) by the Kruskal-Wallis test with Dunn's Multiple Comparison.

**Supplementary Fig. 2.** (A) Correlations between *EGFR* expression and *EGFR* copy number (Pearson  $r = 0.6450$ ,  $P < 0.0001$  in all NSCLCs; Pearson  $r = 0.9841$ ,  $P < 0.0001$  in *EGFR* mutants; Pearson  $r = 0.7448$ ,  $P = 0.0135$  in NSCLCs with wild-type *EGFR/BRAF/KRAS*). (B) Correlations between *EREG* expression and *EGFR* expression. (C) Correlations between *EREG* expression and *EGFR* copy number (Pearson  $r = 0.8455$ ,  $P = 0.0021$  in NSCLCs with wild-type *EGFR/BRAF/KRAS*).

**Supplementary Fig. 3.** A significant correlation was observed between *EREG* mRNA expression and *EREG* protein expression scoring in lung adenocarcinomas (Spearman  $r = 0.5265$ ,  $P < 0.0001$ ).

**Supplementary Fig. 4.** Kaplan-Meier analysis of overall survival (month) in lung adenocarcinoma patients who had not received EGFR-TKI therapy. The patients were classified (A) according to the *EREG* expression levels or (B) according to *EREG* expression levels and *KRAS* mutational status.

**Supplementary Fig. 5.** siRNA-mediated *EREG* silencing in H358 cells as evaluated by Immunofluorescent staining. After 72 h of siRNA transfection, the cells were stained with the anti-*EREG* antibody (green) and Hoechst 33342 (blue) and analyzed by fluorescent microscopy. siControl: treatment with *Tax* siRNA. si*EREG*-1 and si*EREG*-2: treatment with *EREG* siRNAs.

**Supplementary Fig. 6. (A)** siRNA-mediated *EGFR* knockdown in HCC827 NSCLC cells harboring *EGFR* mutations (E746-A750 deletion). NT: treatment with medium alone; siControl: treatment with *Tax* siRNA; si*EGFR*-1 and si*EGFR*-2: two siRNAs targeting different sites of *EGFR* mRNA. \* $P < 0.001$ ; \*\*  $P < 0.05$  for comparison with NT. **(B)** siRNA-mediated *EGFR* knockdown reduces *EREG* mRNA expression in HCC827 cells. \* $P < 0.001$  for comparison of NT. **(C)** Treatment with gefitinib or erlotinib down-regulates *EREG* expression in HCC827 cells. After treatment with gefitinib (1  $\mu\text{M}$ ) or erlotinib (1  $\mu\text{M}$ ) for 24 h, the cells were harvested for subsequent quantitative RT-PCR analysis. \* $P < 0.01$ ; \*\* $P < 0.001$  for comparison with mock treatment (DMSO alone). **(D)** siRNA-mediated *BRAF* knockdown in H1666 NSCLC cells harboring *BRAF* mutations (G466V point mutation). NT: treatment with medium alone; siControl: treatment with *Tax* siRNA; si*BRAF*-1 and si*BRAF*-2: two siRNAs targeting different sites of the *BRAF* mRNA. \* $P < 0.001$  for comparison with NT. **(E)** siRNA-mediated *BRAF* knockdown reduces *EREG* mRNA expression in H1666 cells. \* $P < 0.001$  for comparison with NT. **(F)** The *BRAF* inhibitor SB590885

down-regulates *EREG* expression in H1666 cells. After treatment with SB590885 (10  $\mu$ M) for 24 h, the cells were harvested for subsequent quantitative RT-PCR analysis. \* $P$ <0.001 for comparison with mock treatment (DMSO alone). In Fig. 2A-G, the columns represent the mean  $\pm$  SD (*bars*) in eight determinations from two independent experiments, and NT was set at 100%. All experiments were performed by quantitative RT-PCR analysis. The differences between two groups were analyzed by the Mann-Whitney test, and the differences between more than two groups were analyzed by the Kruskal-Wallis test with Dunn's multiple comparison.

**Supplementary Fig. 7.** Comparisons of *EREG* mRNA expression levels between tumors with or without pleural involvement (P), between tumors with or without lymphatic permeation (L), between tumors with or without vascular invasion (V), and between tumors with any P/L/V factor-positive or without such characteristics. The differences between groups were analyzed by the Mann-Whitney test.

Supplementary Table 1. Characteristics of tumor specimens of non-small cell lung cancer.

| Parameter            |                         | No. | (%)  |
|----------------------|-------------------------|-----|------|
| Gender               | Male                    | 45  | (51) |
|                      | Female                  | 44  | (49) |
| Age                  | ≤70                     | 44  | (49) |
|                      | >70                     | 45  | (51) |
| Smoking history      | Smoker                  | 48  | (54) |
|                      | Non-smoker              | 41  | (46) |
| Stage                | I                       | 57  | (64) |
|                      | II                      | 11  | (12) |
|                      | III                     | 20  | (23) |
|                      | IV                      | 1   | (1)  |
| Pathology            | Adenocarcinoma          | 77  | (87) |
|                      | Squamous cell carcinoma | 12  | (13) |
| Pleural involvement  | +                       | 33  | (37) |
|                      | -                       | 56  | (63) |
| Lymphatic permeation | +                       | 40  | (45) |
|                      | -                       | 49  | (55) |
| Vascular invasion    | +                       | 37  | (42) |
|                      | -                       | 52  | (58) |
| <i>KRAS</i> gene     | Wild-type               | 72  | (81) |
|                      | Mutation                | 17  | (19) |
| <i>EGFR</i> gene     | Wild-type               | 55  | (62) |
|                      | Mutation                | 34  | (38) |

Supplementary Table 2. Cell lines used in the present study.

| Cell line | Histological type | Mutation                        |
|-----------|-------------------|---------------------------------|
| NHBE      | NHBEC             | <i>KRAS/BRAF/EGFR</i> Wild-type |
| SAEC      | NHBEC             | <i>KRAS/BRAF/EGFR</i> Wild-type |
| BEAS-2B   | NHBEC             | <i>KRAS/BRAF/EGFR</i> Wild-type |
| HBEC3     | NHBEC             | <i>KRAS/BRAF/EGFR</i> Wild-type |
| HBEC4     | NHBEC             | <i>KRAS/BRAF/EGFR</i> Wild-type |
| NCI-H157  | NSCLC             | <i>KRAS</i> Mutation            |
| NCI-H358  | NSCLC             | <i>KRAS</i> Mutation            |
| NCI-H441  | NSCLC             | <i>KRAS</i> Mutation            |
| NCI-H460  | NSCLC             | <i>KRAS</i> Mutation            |
| NCI-H1264 | NSCLC             | <i>KRAS</i> Mutation            |
| NCI-H1792 | NSCLC             | <i>KRAS</i> Mutation            |
| NCI-H2009 | NSCLC             | <i>KRAS</i> Mutation            |
| NCI-H2122 | NSCLC             | <i>KRAS</i> Mutation            |
| NCI-H2126 | NSCLC             | <i>KRAS</i> Mutation            |
| HCC44     | NSCLC             | <i>KRAS</i> Mutation            |
| HCC515    | NSCLC             | <i>KRAS</i> Mutation            |
| HCC4017   | NSCLC             | <i>KRAS</i> Mutation            |
| NCI-H1395 | NSCLC             | <i>BRAF</i> Mutation            |
| NCI-H1666 | NSCLC             | <i>BRAF</i> Mutation            |
| NCI-H1755 | NSCLC             | <i>BRAF</i> Mutation            |
| NCI-H2087 | NSCLC             | <i>BRAF</i> Mutation            |
| NCI-H820  | NSCLC             | <i>EGFR</i> Mutation            |
| NCI-H3255 | NSCLC             | <i>EGFR</i> Mutation            |
| NCI-H1975 | NSCLC             | <i>EGFR</i> Mutation            |
| HCC827    | NSCLC             | <i>EGFR</i> Mutation            |
| HCC2279   | NSCLC             | <i>EGFR</i> Mutation            |
| HCC2935   | NSCLC             | <i>EGFR</i> Mutation            |
| HCC4006   | NSCLC             | <i>EGFR</i> Mutation            |
| HCC4011   | NSCLC             | <i>EGFR</i> Mutation            |
| PC9       | NSCLC             | <i>EGFR</i> Mutation            |
| NCI-H661  | NSCLC             | <i>KRAS/BRAF/EGFR</i> Wild-type |
| NCI-H838  | NSCLC             | <i>KRAS/BRAF/EGFR</i> Wild-type |
| NCI-H1299 | NSCLC             | <i>KRAS/BRAF/EGFR</i> Wild-type |
| NCI-H1437 | NSCLC             | <i>KRAS/BRAF/EGFR</i> Wild-type |
| NCI-H1648 | NSCLC             | <i>KRAS/BRAF/EGFR</i> Wild-type |
| NCI-H1819 | NSCLC             | <i>KRAS/BRAF/EGFR</i> Wild-type |
| HCC15     | NSCLC             | <i>KRAS/BRAF/EGFR</i> Wild-type |
| HCC78     | NSCLC             | <i>KRAS/BRAF/EGFR</i> Wild-type |
| HCC95     | NSCLC             | <i>KRAS/BRAF/EGFR</i> Wild-type |
| HCC193    | NSCLC             | <i>KRAS/BRAF/EGFR</i> Wild-type |

NHBEC: Noncancerous human bronchial epithelial cell line

NSCLC: Non-small cell lung cancer

Supplementary Table 3. Univariate and multivariate analysis in patients with non-small cell lung cancer.

| Prognostic marker                                 | Hazard ratio | 95% CI        | P value |
|---------------------------------------------------|--------------|---------------|---------|
| Univariate analysis                               |              |               |         |
| Age (>70 vs ≤70)                                  | 1.392        | 0.504 – 3.846 | 0.5241  |
| Gender (male vs female)                           | 1.490        | 0.539 – 4.123 | 0.4419  |
| Smoking history (smoker vs non-smoker)            | 1.852        | 0.657 – 5.221 | 0.2439  |
| Pathology (adeno vs squamous)                     | 0.678        | 0.190 – 2.422 | 0.5499  |
| Stage (I-II vs III-IV)                            | 1.219        | 0.343 – 4.329 | 0.7596  |
| <i>KRAS</i> gene (mutation vs wild-type)          | 2.244        | 0.709 – 7.108 | 0.1693  |
| <i>EGFR</i> gene (mutation vs wild-type)          | 0.616        | 0.210 – 1.803 | 0.3762  |
| <i>EREG</i> expression (as a continuous variable) | 1.002        | 1.000 – 1.004 | 0.0239  |
| Multivariate analysis                             |              |               |         |
| Pathology (adeno vs squamous)                     | 0.629        | 0.165 – 2.399 | 0.4970  |
| Stage (I-II vs III-IV)                            | 1.578        | 0.497 – 5.012 | 0.4388  |
| <i>KRAS</i> gene (mutation vs wild-type)          | 1.584        | 0.470 – 5.345 | 0.4583  |
| <i>EREG</i> expression (as a continuous variable) | 1.002        | 1.000 – 1.004 | 0.0346  |

Supplementary Table 4. Univariate and multivariate analysis in adenocarcinoma patients.

| Prognostic marker                                 | Hazard ratio | 95% CI         | P value |
|---------------------------------------------------|--------------|----------------|---------|
| Univariate analysis                               |              |                |         |
| Age (>70 vs ≤70)                                  | 1.245        | 0.394 – 3.938  | 0.7088  |
| Gender (male vs female)                           | 1.493        | 0.467 – 4.777  | 0.4995  |
| Smoking history (smoker vs non-smoker)            | 1.948        | 0.617 – 6.151  | 0.2556  |
| Stage (I-II vs III-IV)                            | 1.176        | 0.316 – 4.372  | 0.8086  |
| <i>KRAS</i> gene (mutation vs wild-type)          | 3.329        | 0.982 – 11.292 | 0.0536  |
| <i>EGFR</i> gene (mutation vs wild-type)          | 0.632        | 0.200 – 1.997  | 0.4338  |
| <i>EREG</i> expression (as a continuous variable) | 1.002        | 1.000 – 1.004  | 0.0133  |
| Multivariate analysis                             |              |                |         |
| Stage (I-II vs III-IV)                            | 1.912        | 0.439 – 8.329  | 0.3878  |
| <i>KRAS</i> gene (mutation vs wild-type)          | 2.852        | 0.768 – 10.595 | 0.1175  |
| <i>EREG</i> expression (as a continuous variable) | 1.002        | 1.000 – 1.004  | 0.0366  |
